# Supplementary figures and images for: Transcriptomic Analysis in Marine Medaka Gill Reveals That the Hypo-Osmotic Stress Could Alter the Immune Response via the IL17 Signaling Pathway
Source: MDPI journal article supplement (doi:10.3390/ijms232012417), 2022-10-17

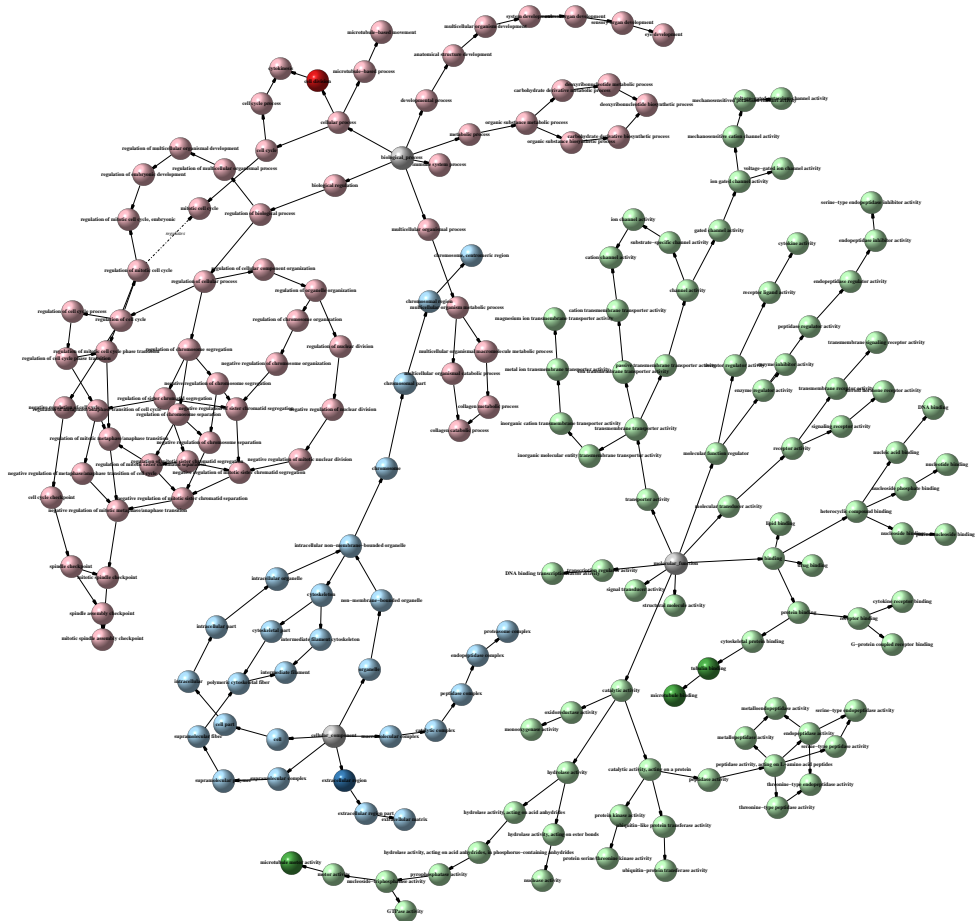

Supplement: s1 [file s1]
